# Supplementary material
Source: publisher figshare collection journal article supplement (https://asha.figshare.com/articles/dataset/_/14963547)
Supplement: Supplementary file 1 [file 1]

**Supplemental Material S2.** Number of treatment sessions and mean time of treatment sessions (minutes) for each participants and overall for each stimulus lists across treatment phases.

| Stimulus List          | Participant 1 |                 | Participant 2 |                 | Participant 3 |                 | Participant 4 |                 | Overall mean |            |
|------------------------|---------------|-----------------|---------------|-----------------|---------------|-----------------|---------------|-----------------|--------------|------------|
|                        | # of sessions | Mean time (min) | Sessions     | Time (min) |
| List 1                 |               |                 |               |                 |               |                 |               |                 |              |            |
| Phase 1                | 7             | 33              | 4             | 32              | 8             | 33              | 16            | 40              | 9            | 34         |
| Phase 2                | 5             | 33              | 6             | 37              | 9             | 38              | NA            | NA              | 7            | 36         |
| Phase 3                | 6             | 33              | 4             | 44              | 20            | 33              | NA            | NA              | 10           | 37         |
| List 2                 |               |                 |               |                 |               |                 |               |                 |              |            |
| Phase 1                | 15            | 33              | 3             | 30              | 4             | 34              | 3             | 35              | 6            | 33         |
| Phase 2                | 4             | 29              | 4             | 27              | 16            | 32              | 4             | 39              | 7            | 32         |
| Phase 3                | 4             | 38              | 8             | 36              | 10            | 33              | 12            | 41              | 9            | 37         |
| List 3                 |               |                 |               |                 |               |                 |               |                 |              |            |
| Phase 1                | 3             | 35              | 5             | 35              | 4             | 34              | 7             | 32              | 5            | 34         |
| Phase 2                | 3             | 39              | 5             | 30              | 4             | 39              | 10            | 40              | 6            | 37         |
| Phase 3                | 8             | 32              | 8             | 32              | 10            | 40              | 10            | 40              | 9            | 36         |
| All Lists              |               |                 |               |                 |               |                 |               |                 |              |            |
| Booster Tx             | 6             | 34              | NA            | NA              | 6             | 39              | NA            | NA              | 6            | 37         |
| Participant total/mean | 61            | 38              | 47            | 34              | 91            | 35              | 62            | 38              | 8            | 35         |

*Note.* min = minutes; NA = not applicable/no application of treatment; Tx = treatment.
