# Supplementary material
Source: publisher figshare collection journal article supplement (https://asha.figshare.com/articles/dataset/_/14963547)

**Supplemental Material S1.** Electropalatographic displays of tongue to palate contact (blue circles) for two treated speech sound targets with participant’s perceptually incorrect production, clinician’s model, and participant’s perceptually correct production.

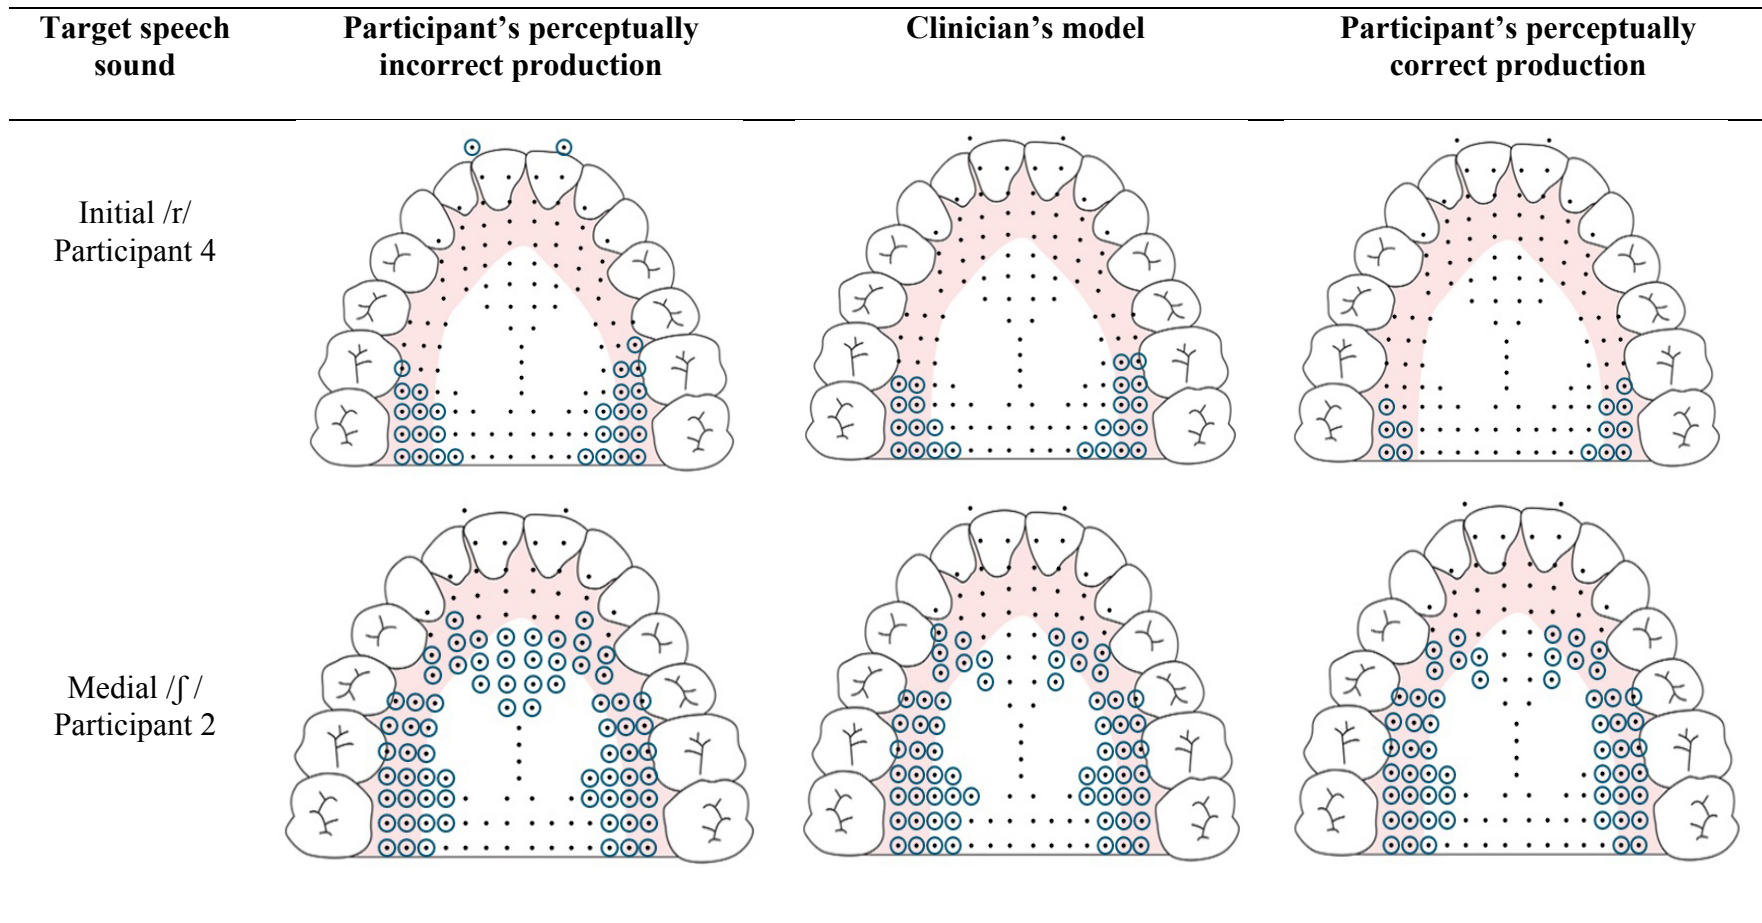

Supplement: Supplementary file 2 [file 1]
